# Supplementary material for: Rapid tumor inhibitionviamagnetic hyperthermia regulated by caspase 3 with time-dependent clearance of iron oxide nanoparticles
Source: Royal Society of Chemistry journal article supplement (doi:10.1039/d0bm01705a), 2021-01-01
Supplement: d0bm01705a1.pdf [file d0bm01705a1.pdf]

**Rapid tumor inhibition via magnetic hyperthermia regulated by caspase 3 with time-dependent clearance of iron oxide nanoparticles**

Anjali Chauhan<sup>1,2</sup>, Swati Midha<sup>1,4\*</sup>, Ravi Kumar<sup>1</sup>, Ravindra Meena<sup>1</sup>, Pooja Singh<sup>3</sup>, Sushil K.

Jha<sup>2</sup> and Bijoy K. Kuanr<sup>1\*\*</sup>

<sup>1</sup>Special Centre for Nanoscience, Jawaharlal Nehru University, New Delhi-110067, India

<sup>2</sup>School of Life Sciences, Jawaharlal Nehru University, New Delhi-110067, India

<sup>3</sup>National Institute of Plant Genome research, New Delhi-110067, India

<sup>4</sup>UCL Division of Surgery & Interventional Science, University College London, London, United Kingdom

**\*\*Corresponding author**

Prof. Bijoy K. Kuanr

Email: [bkuanr@gmail.com](mailto:bkuanr@gmail.com); Phone: +91 (0)11 26738784

**\*Co-corresponding author**

Dr. Swati Midha

Email: [swati.mid@gmail.com](mailto:swati.mid@gmail.com)

## Supplementary Table

| <b>Drug</b>      | <b>Concentration<br/>(mg/kg)</b> | <b>Route of<br/>administration</b> | <b>Frequency of<br/>administration</b> |
|------------------|----------------------------------|------------------------------------|----------------------------------------|
| Cyclosporine     | 30                               | i.p.                               | Days 1 to 7, daily                     |
| Ketaconazole     | 10                               | Oral                               | Days 1, 3, 5                           |
| Cyclophosphamide | 30                               | s.c.                               | Days 3, 6                              |

**Supplementary Table 1:** Dosage for immune suppression in Wistar rats.

## Supplementary Figures

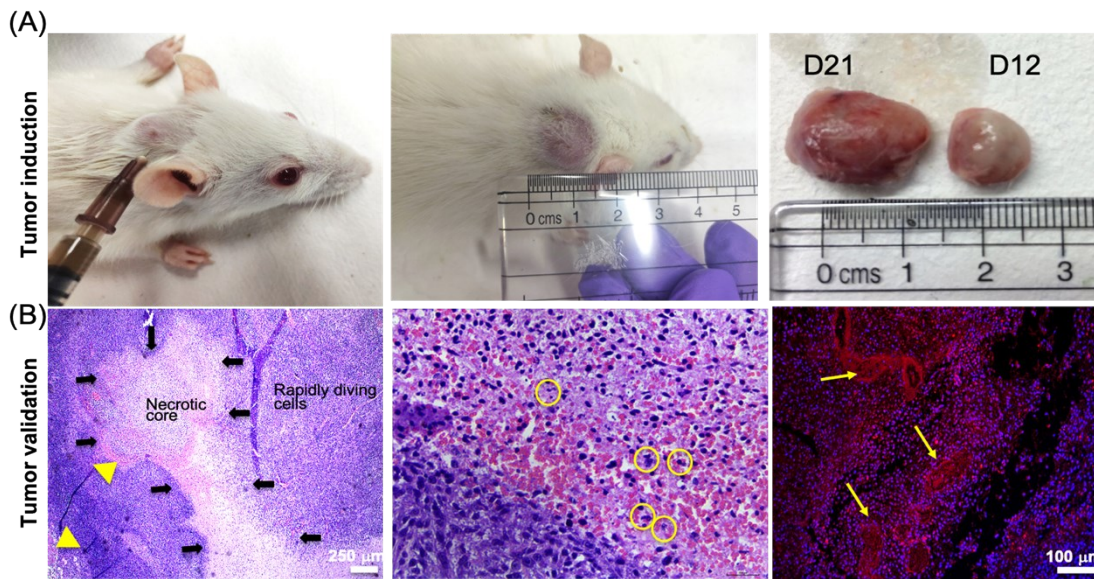

**Supplementary Figure 1:** *In vivo* tumor model. (A) Tumor induction using 200  $\mu\text{l}$  of C6 glioblastoma cells ( $5 \times 10^6$ ) injected subcutaneously into the flank of each rat, followed by tumor development and extraction at different time points (D21 and D12 represents tumor extraction at day 21 and day 12, respectively). (B) Tumor validation confirming glioblastoma origin (arrows—pseudo-palisades; arrowhead—neo-vasculature; circles—mitotic tumor cells) using H&E staining and GFAP marker (red). Nuclei were stained with DAPI (blue).

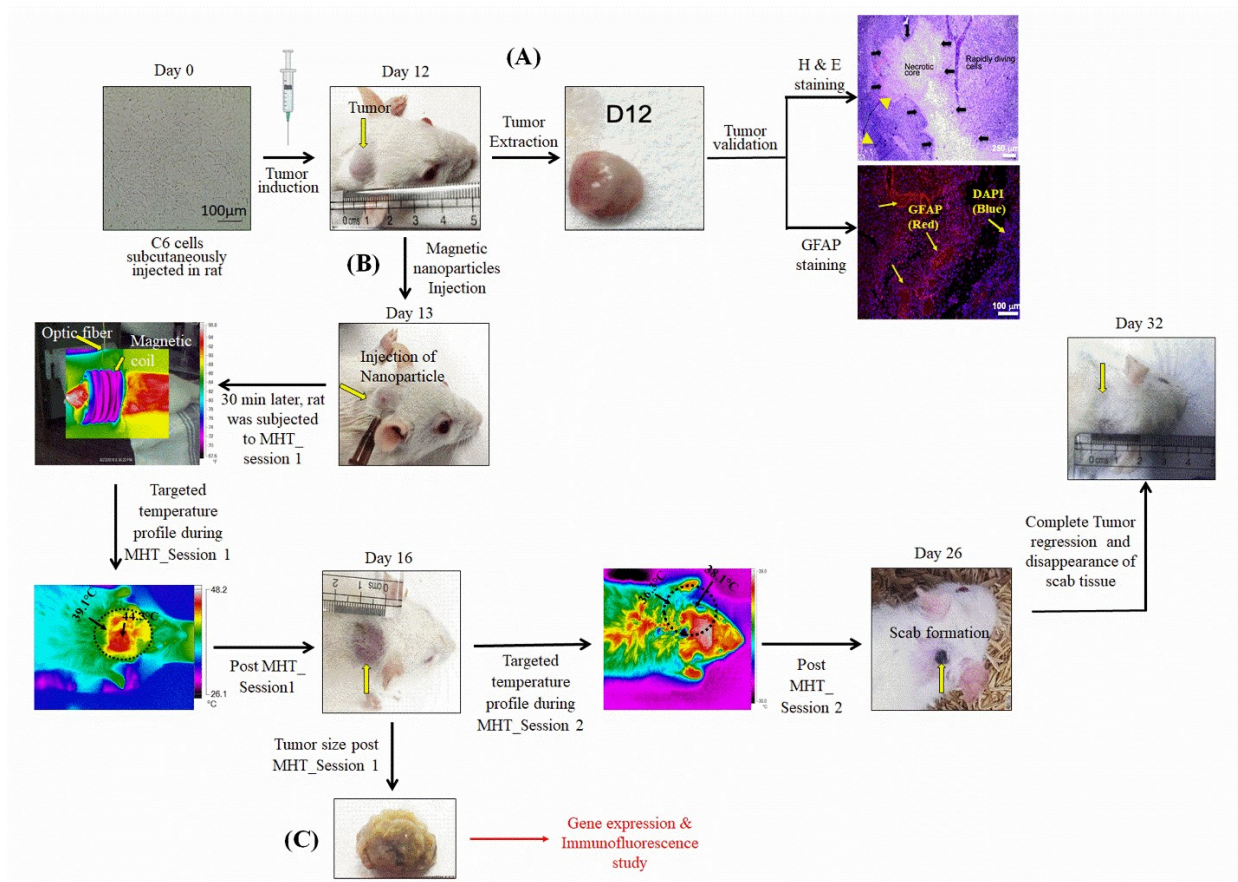

**Supplementary Figure 2:** Schematic diagram for the *in vivo* procedure. C6 cells were injected subcutaneously in the rat for tumor induction. (A) Tumors were extracted at day 12 for tumor validation: H & E staining and GFAP staining. (B) Nanoparticles were injected intra-tumorally at day 13. 30 min later, rats were subjected to hyperthermia session 1. At day 20, rats were subjected to hyperthermia session 2. Scab tissue formation was observed at around day 26, which was later disappeared and complete tumor regression was observed. (C) At day 16, tumors were extracted from a group of rats and processed for gene expression and immunofluorescence assays.
